# Supplementary material for: Utilizing alkoxyphenyl substituents for side-chain engineering of efficient benzo[1,2-b:4,5-b′]dithiophene-based small molecule organic solar cells
Source: Royal Society of Chemistry journal article supplement (doi:10.1039/c5cp02632f), 2015-01-01
Supplement: c5cp02632f1.pdf [file c5cp02632f1.pdf]

## Supporting Information

### Utilizing alkoxyphenyl substituents for side-chain engineering of efficient benzo[1,2-*b*:4,5-*b'*]dithiophene-based small molecule organic solar cells

*Zhengkun Du<sup>a,c</sup>, Weichao Chen<sup>a</sup>, Meng Qiu<sup>a</sup>, Yanhua Chen<sup>a,b</sup>, Ning Wang<sup>a</sup>, Ting Wang<sup>a</sup>,  
Mingliang Sun<sup>\*b</sup>, Donghong Yu<sup>\*c,d</sup>, and Renqiang Yang<sup>\*a</sup>*

<sup>a</sup> CAS Key Laboratory of Bio-based Materials, Qingdao Institute of Bioenergy and Bioprocess Technology, Chinese Academy of Sciences, Qingdao 266101, China,

<sup>b</sup> Institute of Materials Science and Engineering, Ocean University of China, Qingdao 266100, China,

<sup>c</sup> Department of Chemistry and Bioscience, Aalborg University, DK-9220, Aalborg, Denmark

<sup>d</sup> Sino-Danish Centre for Education and Research (SDC), Niels Jensens Vej 2, DK-8000, Aarhus, Denmark.

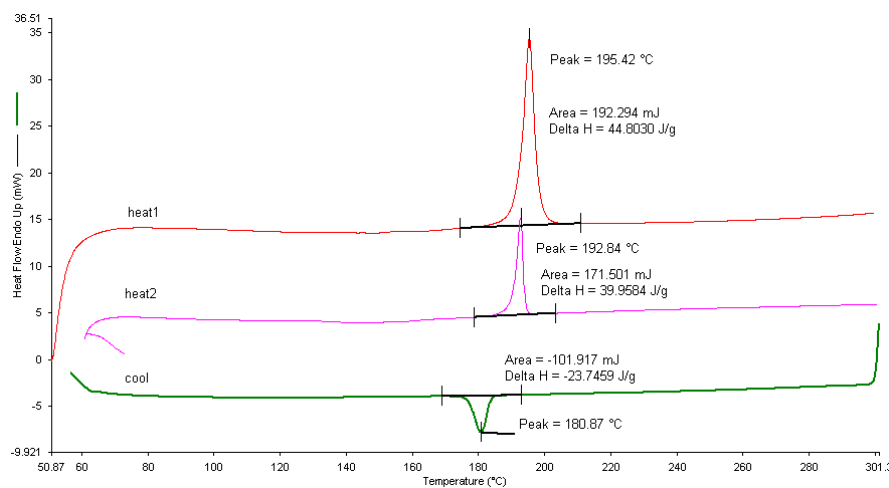

**Figure S1.** DSC thermograms of DCA3TBDTP.

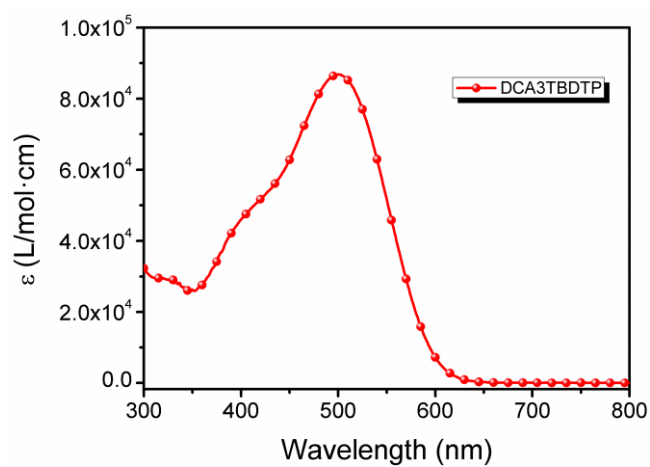

**Figure S2.** UV-vis absorption spectrum of DCA3TBDTP in CHCl<sub>3</sub> solution ( $5 \times 10^{-6}$  mol/L).

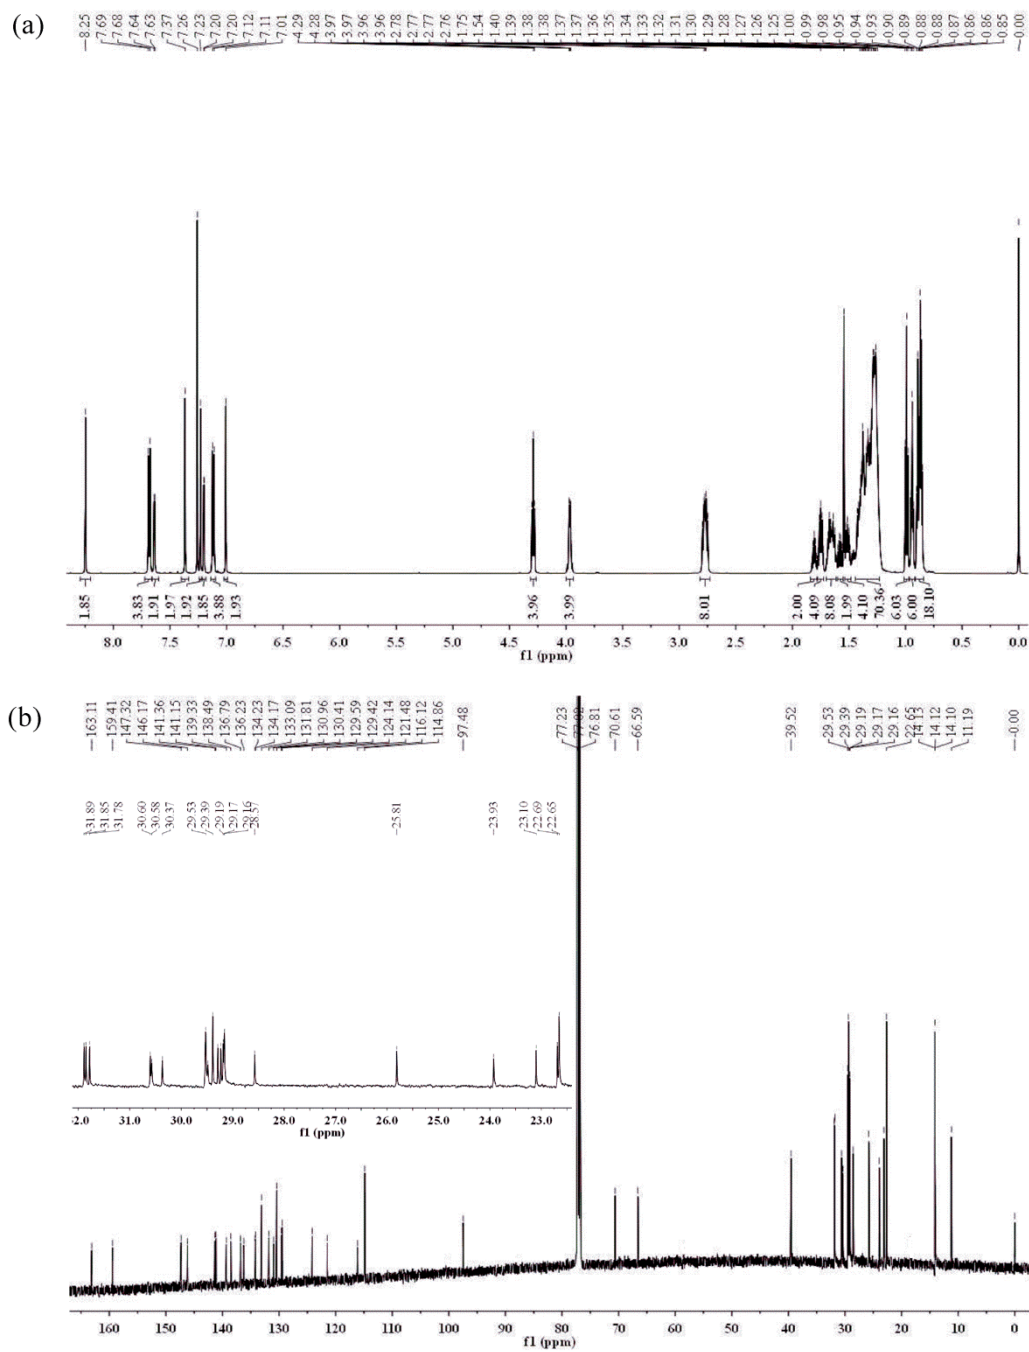

**Figure S3.** (a)  $^1\text{H}$  NMR and (b)  $^{13}\text{C}$  NMR spectra of DCA3TBDTP.
